# Supplementary material for: l-Histidine-assisted template-free hydrothermal synthesis of α-Fe2O3porous multi-shelled hollow spheres with enhanced lithium storage properties
Source: Royal Society of Chemistry journal article supplement (doi:10.1039/c4ta01253d), 2014-01-01
Supplement: c4ta01253d1.pdf [file c4ta01253d1.pdf]

Electronic Supplementary Information

## L-histidine-assisted template-free hydrothermal synthesis of $\alpha$ -Fe<sub>2</sub>O<sub>3</sub> porous multi-shelled hollow spheres with enhanced lithium storage properties

Zhen-guo Wu,<sup>a,b</sup> Yan-jun Zhong,<sup>a,b</sup> Jun-tao Li,<sup>b\*</sup> Xiao-dong Guo,<sup>a\*</sup> Ling Huang,<sup>b</sup> Ben-he Zhong<sup>a</sup> and Shi-gang Sun,<sup>b</sup>

<sup>a</sup> School of Chemical Engineering, Sichuan University, Chengdu 610065, P. R. China.

<sup>b</sup> College of Energy, State Key Laboratory of Physical Chemistry of Solid Surfaces, College of Chemistry and Chemical Engineering, Xiamen University, Xiamen 361005, Fujian Province, P. R. China.

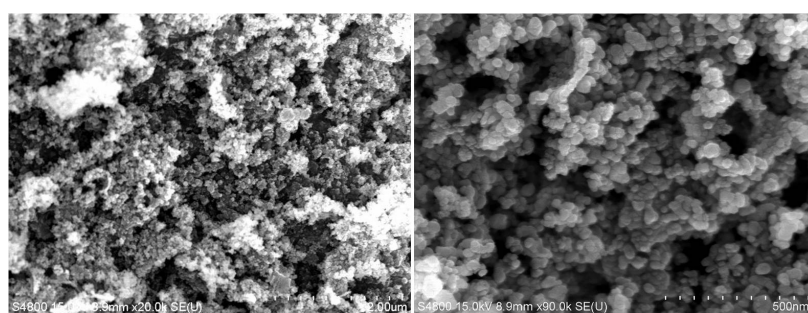

Fig.S1 SEM images of Fe<sub>2</sub>O<sub>3</sub> hydrothermal treatment of 180 °C for 12 h with the L-histidine completely dissolved in solution by adding more deionized water. Only nanoparticles of Fe<sub>2</sub>O<sub>3</sub> observed.

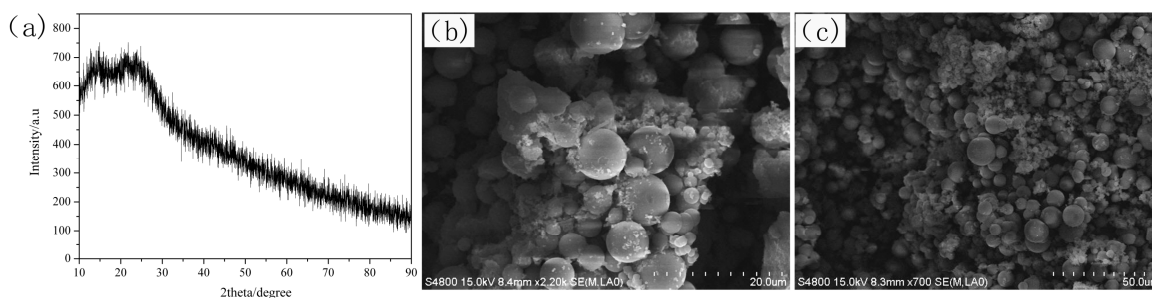

Fig.S2 XRD pattern of precursor (a) and SEM images of precursor (b), (c) the precursor of the  $\alpha$ -Fe<sub>2</sub>O<sub>3</sub> PMSHSs. The XRD results indicate that the precursor is amorphous. The SEM results show that the precursor was microspheres with relative smooth surface.

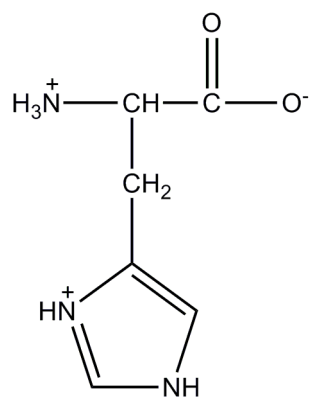

Fig.S3 structure of L-histidine with protons
